# Supplementary material for: A Survey of Transposon Landscapes in the Putative Ancient Asexual Ostracod Darwinula stevensoni
Source: MDPI journal article supplement (doi:10.3390/genes12030401), 2021-03-11
Supplement: s1 [file s1]

Article

# A survey of transposon landscapes in the putative ancient asexual ostracod *Darwinula stevensoni*

Isa Schön<sup>1,2\*</sup>, Fernando Rodriguez<sup>3a</sup>, Matthew Dunn<sup>3b</sup>, Koen Martens<sup>1,4</sup>, Michael Shribak<sup>3c</sup> and Irina Arkhipova<sup>3d</sup>

<sup>1</sup> Royal Belgian Institute of Natural Sciences, OD Nature, Freshwater Biology, Vautierstraat 29, B-1000 Brussels, Belgium; [ischoen@naturalsciences.be](mailto:ischoen@naturalsciences.be)

<sup>2</sup> University of Hasselt, Researchgroup CMK, Diepenbeek, Belgium; ORCID 0000-0001-9269-6487

<sup>3</sup> Marine Biological Laboratory, MBL Street 7, Woods Hole MA 02453, USA

<sup>a</sup> ORCID: 0000-0003-4044-8734; [frodriguez@mbi.edu](mailto:frodriguez@mbi.edu)

<sup>b</sup> [mjdunn@umass.edu](mailto:mjdunn@umass.edu)

<sup>c</sup> ORCID: 0000-0002-5849-6294; [mshribak@mbi.edu](mailto:mshribak@mbi.edu)

<sup>d</sup> ORCID: 0000-0002-4805-1339; [iarkhipova@mbi.edu](mailto:iarkhipova@mbi.edu)

<sup>4</sup> University of Ghent, Dept Biology, Ghent, Belgium; ORCID: 0000-0001-8680-973X; [darwinula@gmail.com](mailto:darwinula@gmail.com); ORCID: 0000-0001-8680-973X

\* Correspondence: [ischoen@naturalsciences.be](mailto:ischoen@naturalsciences.be)

<sup>§</sup> Co-first

Received: date; Accepted: date; Published: date

**Abstract:** How asexual reproduction shapes transposable element (TE) content and diversity in eukaryotic genomes remains debated. Here, we performed an initial survey of TE load and diversity in the putative ancient asexual ostracod *Darwinula stevensoni*. We examined long contiguous stretches of DNA in clones selected from a genomic fosmid library, totaling about 2.5 Mb, and supplemented these data with results on TE abundance and diversity from an Illumina draft genome. In contrast to other TE studies in putatively ancient asexuals, which revealed relatively low TE content, we found that at least 19% of fosmid DNA sequences and 26% of the genome corresponded to known transposons. We observed a high diversity of transposon families, including LINE, gypsy, PLE, mariner/Tc, hAT, CMC, Sola2, Ginger, Merlin, Harbinger, MITEs and helitrons. The predominantly low levels of sequence diversity indicate that many TEs are or have recently been active. No correlation was found between telomeric repeats and non-LTR retrotransposons present near telomeres in the fosmid data as in other taxa. We found that most TEs in the fosmid data were located outside of introns and almost none were found in exons. We also report an N-terminal Myb/SANT-like DNA-binding domain in site-specific R4/Dong non-LTR retrotransposons. Although initial results on transposable loads will need to be verified at a genome-wide scale with high quality draft genomes, this study provides important first insights into the dynamics of TEs in putative ancient asexual ostracods.

**Keywords:** transposable elements; retrotransposons; DNA transposons; crustaceans; asexuality

Deleted: In the absence of a high-quality whole-genome draft, w...

Deleted: .1

Deleted: M

45

46 **1. Introduction**

47 The influence of reproductive mode on transposon content and distribution in  
48 eukaryotic genomes remains a subject of debate as it seems to be shaped by several  
49 evolutionary forces acting in opposite directions. Sexual reproduction is expected to  
50 greatly facilitate spread of vertically transmitted transposons in populations [1], as  
51 has been experimentally shown in yeast (see for example [2] or [3]).

52 All asexuals originate from sexual ancestors. If they inherited transposons, the  
53 absence of meiotic recombination should lead to reduced efficacy of selection and  
54 accumulation of deleterious mutations [4] and transposons, at least in finite  
55 populations [5,6]. Empirical evidence for these predictions comes from non-  
56 recombining sex chromosomes e.g. [7] and other non-recombining parts of the  
57 genome [8,9]. Such unrestrained TE proliferation should eventually drive asexual  
58 lineages to extinction unless asexual hosts can keep TE copy numbers under tight  
59 control [10–12], with putative ancient asexual bdelloids as the most striking example  
60 [10,13,14] of having reduced numbers of vertically transmitted retrotransposons  
61 while they still harbor some DNA transposons that can be horizontally transmitted.  
62 In line with these predictions, sexual *Daphnia pulex* have higher loads of DNA  
63 transposons [15], LTR retrotransposons [16] or more insertion polymorphisms of  
64 transposons [17] than their asexual counterparts. Comparative genomic studies on  
65 asexual and sexual arthropods [18], nematodes [19], evening primroses [20] and  
66 green algae [21], however, did not show any significant effect of the reproductive  
67 mode on transposon content and evolution. Other genomic studies reported higher  
68 transposon loads in asexuals as for example for root-knot nematodes [22] or parasitic  
69 wasps [23].

70 These contrasting results can partly be explained by different lineage ages [24].  
71 Purging of transposons in asexuals can take a very long time, and transposons are  
72 expected to accumulate if they cannot be removed [25]. Theoretical studies [26,27]  
73 and an ever-increasing number of genomic studies from different host organisms  
74 [28,29] suggest that additional factors besides the reproductive mode will also  
75 influence transposon diversity and load, such as initial transposon load in sexual  
76 ancestors, DNA methylation, population size [30], environmental fluctuations [27],  
77 strengths of selection and drift [19], and molecular defense mechanisms against  
78 transposable elements. DNA transposons are more frequently transmitted  
79 horizontally (as in the example of insects; [31]) than retrotransposons and are  
80 expected to be less affected by the reproductive mode.

81 To better understand transposon evolution, their molecular characteristics and  
82 biological effects, additional *in vivo* and *in vitro* studies are thus required [28],  
83 especially from non-model organisms. The continuous increase of genomic data has  
84 also revealed the extent of lineage-specific transposon diversities, which further  
85 increases the methodological challenges of analyzing these elements [28] and  
86 provides additional motivation for studying them in a wide range of organisms.

87 The ostracod family Darwinulidae is one of the few examples of putative ancient  
 88 asexual animals [32–35], to which bdelloid rotifers also belong [36]. Fossil data  
 89 indicate that some darwinulids might have been asexual for 200 million years [37],  
 90 and the type species of this family that is investigated here, *Darwinula stevensoni*  
 91 (Figure 1), for about 25 million years [38]. There is only one study on transposable  
 92 elements of darwinulid ostracods describing novel LINE-like retroelements [39],  
 93 and long, contiguous genome assemblies from these ostracods are not yet available.

94

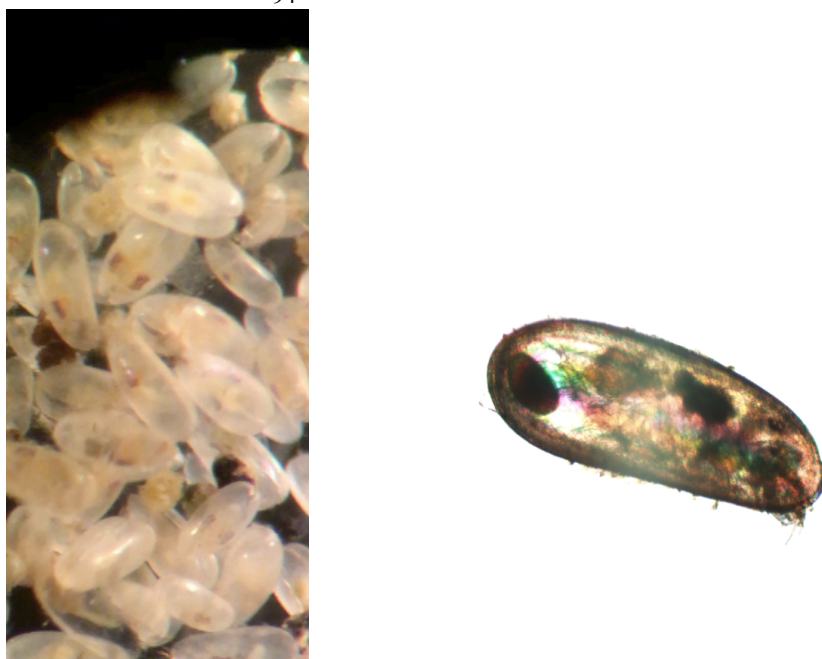

102 **Figure 1.** *Darwinula stevensoni*. a. A sample of multiple individuals of *Darwinula*  
 103 *stevensoni*. Taken by Jeroen Vendericks. b. Lateral view of the carapace of an  
 104 individual *Darwinula stevensoni*. This picture was taken with the polychromatic  
 105 polarization microscope [40] with a 4x objective lens and a DP73 camera. The total  
 106 length of the animals is around 800 µm. In the left corner, an embryo in the brooding  
 107 pouch is visible.

108  
 109 Here, we used long DNA sequences of *D. stevensoni* based on selected clones of  
 110 a genomic fosmid library, totaling around 2.5 Mb, for addressing four aims: (1) To  
 111 gain initial insights into TE content, diversity and activity in darwinulid ostracod  
 112 genomes and confirm these preliminary results with data from an Illumina draft  
 113 genome of *D. stevensoni*; (2) Examine possible links of TEs with telomeres; (3)  
 114 Compare the location of TEs to coding gene regions (CDS); (4) Assess the possible  
 115 impact of anciently asexual reproduction on TE landscapes of non-marine ostracods.  
 116 We observed a high diversity of TEs in the putative ancient asexual ostracod *D.*

Formatted: Font: Italic

117 *stevensoni*, and a high prevalence of 19-26% in the surveyed fosmid and draft genome  
118 DNA sequence data. Most TEs were located outside of coding regions, had no link  
119 to telomeres and showed evidence of recent activity. Our results provide first  
120 indications that putative ancient asexual ostracods might not be able to efficiently  
121 purge TEs from their genomes.  
122

Deleted: more than

Deleted:

Deleted: 5

## 123 2. Materials and Methods

### 124 2.1. Construction, screening and sequencing of a genomic fosmid library

125 A genomic fosmid library of *D. stevensoni* was constructed at Clemson University  
126 (USA) from 1000 pooled individual ostracods, sampled from the monoclonal Belgian  
127 population in Hollandersgatkreek, because of the small size of these ostracods (L= c  
128 0.8 mm - Figure 1a & b). Ostracods were first incubated for ten days in pure water  
129 to evacuate any possible contaminants from the gut. High molecular weight DNA  
130 was isolated, randomly fragmented, end-repaired, phosphorylated, and size  
131 selected by pulsed-field gel electrophoresis. Size-selected fragments were ligated  
132 with the linearized dephosphorylated fosmid vector pCC2FOS (NovoPro) and then  
133 packaged by lambda packing extracts and plated on T1-phage resistant *E. coli*. A  
134 total of 18,432 recombinant colonies were randomly picked with a Genetix Q-bot  
135 robot and stored as individual clones at -80°C in 384-well microtiter plates. Fosmids  
136 have an average insert size of 35 to 45 kbp, as was confirmed by randomly sampling  
137 48 clones. Preliminary evaluation of *D. stevensoni* from the same Belgian population  
138 with flow cytometry and DAPI staining revealed a genome size of 0.86 to 0.93 pg,  
139 equaling 840 to 900 Million bp (Pacziesniak et al., unpubl. data). Karyological studies  
140 have shown that *D. stevensoni* nuclei contains 22 dot-like chromosomes [41] that  
141 cannot be visually grouped into homologous pairs, making it impossible to infer the  
142 ploidy level of *D. stevensoni* from cytological observations.

143 To identify fosmids containing either TEs or telomeres, specific overgo probes  
144 for LINE-like and mariner-like elements and telomeric repeats were developed (see  
145 Table S1 for details) from published data on two LINE-like elements of *D. stevensoni*  
146 [39] and unpublished data on TEs from non-marine ostracods, which had been  
147 acquired with PCR walking and Sanger sequencing using the general primers of  
148 [10]. Probes for telomeres were based on the universal arthropod telomeric repeat  
149 (TR) with the pentameric unit TTAGG [42]. We also screened for fosmids containing  
150 single-copy nuclear genes of *D. stevensoni* [43].

151 High density colony filters from the entire fosmid library were produced using  
152 a Genetix Q-bot in a 4x4 double-spotted array on GE HealthCare Hybond N+  
153 membranes. Labelled PCR probes were used for hybridization of high-density  
154 colony filters and hits were called with Hybdecon v.01. The identity of fosmids  
155 having hits for TEs, single copy nuclear genes and/or TRs was assessed. The  
156 hybridization experiments with the fosmid library revealed 86 fosmids with positive  
157 hits for the mariner probe, 18 for LINE-like *Daphne*, 33 for LINE-like *Syrinx* elements  
158 and 40 fosmids with hits for various nuclear genes, respectively (Table S2). A set of

96 fosmids, of which 13 contained positive hits for chosen TEs (5 Daphne, 5 Syrinx, 3 mariner) and the other 83 for nuclear genes, were selected for further detailed analyses. DNA was extracted and prepared for high-throughput sequencing with the Ion Xpress™ plus gDNA Fragment Library preparation kit and the Ion OneTouch™ 200 Template Kit v2 from Life Technologies. Individual fosmids were sheared, ligated to adapters with barcodes, size selected, pooled and used for an emulsion PCR. Fosmids were sequenced with the Ion PGM™ Sequencing 300 Kit on the Ion Torrent PGM using the Ion 316™ chips. A total of 779M DNA basepairs and 2,827,903 reads were generated, with a median read lengths of 290 bp and maximum lengths of 433 bp. Fosmids were demultiplexed, and quality filtering and assembly conducted with CLC workbench (Qiagen; version 7.5.1) using default parameters.

Another 11 fosmids were selected by hybridization with probes for single nuclear copy genes of potential horizontal origin (see Table S2) as part of the LATTECO project at the CNRGV (INRA facility, Toulouse, France). Sequence identities of the ends of positive fosmids were validated by PCR and Sanger sequencing. For PacBio RS II sequencing, 2 µg of each validated fosmid was tagged with PacBio tags and then pooled. The library was generated with the standard Pacific Biosciences library preparation protocol for 10 kb libraries and sequenced on one SMRT Cell using the P6v2 chemistry following the standard operating procedures of the manufacturer at the NGI (<https://ngisweden.scilifelab.se/>). Assembly of the PacBio RS II reads followed the HGAP workflow. The SMRT® Analysis (v2.2.0) software suite was used for HGAP implementation. Reads were first de-multiplexed and then aligned using BLASR against “*E. coli* str. K12 substr. DH10B, complete genome”. Identified *E. coli* reads and low-quality reads (read quality <0.80 and read length <500 bp) were removed. Filtered reads were then preassembled to generate long and highly accurate sequences. To perform this step, we separated the smallest and longest reads (e.g. >11 kbp) in order to correct read errors by mapping the smallest to the longest reads. Obtained sequences were filtered against vector sequences, and sequences were assembled into draft assemblies with the Celera assembler. As the final step of the HGAP workflow, “polishing” with Quiver significantly reduced remaining insertions and deletions and base substitution errors, resulting in high quality assemblies of a single contig per fosmid.

We analysed 341 contigs with a minimum length of 100bp for further analyses.

We also conducted BLAST searches [44] with all contigs to each other to identify potentially overlapping redundant regions. The content of matching regions was further checked manually. If these included identical transposons, we considered them as evidence for recent transposition and kept the data. If (short) contigs fully matched other contigs, they were excluded. Likewise, short overlaps at the 5′ or 3′ end of fosmid sequences were also excluded if they showed more than 94% overlap with other contigs. In the absence of a phased reference genome, we can however not be certain if overlapping contigs originate from the same chromosome or from its homolog, as the allelic divergence is expected to be low, especially if the overlap is relatively short. To still account for possible bias from overlapping contig ends,

Deleted: some

Deleted: most

Formatted: Highlight

Formatted: Highlight

we are providing ranges for contigs and fosmid total lengths and estimates of exon, intron and TE content below.

All sequence data have been submitted to the GSS of ncbi; accession number XXXXX.

## 2.2. Illumina draft genome of *D. stvensoni*

Besides the fosmid DNA sequence data, we also analyzed a recently published Illumina draft genome (European Nucleotide Archive accession number PRJEB38362) of *D. stvensoni* [45] for its TE content and diversity. This draft genome was assembled from DNA extractions of a single female, followed by Whole Genome Amplification to provide sufficient material for the preparation of three 2x125bp paired-end libraries (average insert sizes of 250-300, 550 and 700bp), and two mate-pair libraries (average insert sizes of 3000 and 5000bp), respectively, which were sequenced on an Illumina HiSeq 3000 system. The assembly has a size of 382.1 Mb, an N50 of 56.4 kb, an arthropod BUSCO score of 93.7% (complete single copy genes) and consists of 62,118 scaffolds [45].

## 2.3 De novo identification of ostracod TEs

We used the REPET package with default settings [46,47] for *de novo* TE identification and annotation of fosmid and draft genome data in three steps: detecting repeated sequences and potential TEs, clustering of these sequences, and generating consensus sequences for each cluster. Consensus sequences were classified following Wicker's TE classification [48] and transposons were grouped by families. Repeat Masker [49] was applied for TE classification and plot building, using the local fosmid and genomic libraries of *D. stvensoni* from REPET. We constructed TE landscape divergence plots to evaluate the frequencies of different TE families in our data set and estimate the Kimura substitution level of each TE family with adjusted CpG as a measure of TE activity over time. We also translated all fosmid DNA sequences and used the translated data in Censor (https://www.girinst.org/censor/) to reveal non-multicopy TEs and to classify TEs at the amino-acid level.

## 2.4. Assessing insertion sites of TEs from fosmid data

For obtaining preliminary information on the genomic location of TEs, we compared hybridization signals between fosmids with positive hits for telomeres and TEs. To assess if TEs were found in coding or non-coding genomic regions, we used our custom TE library with Repeat Masker to identify and soft-mask all TEs. The masked DNA sequence data were then used for gene predictions with Augustus [50] with *Drosophila melanogaster* as species parameter. In regions being identified as coding regions in the sequenced fosmids, the lengths of exons and introns were calculated from the exact locations to estimate the overall frequency of exons and introns in the DNA sequence data. To identify possible overlap of TEs and exons, we used BEDTools v2.29.2 [51] to compare the exact exon and intron locations in

Deleted: (to be completed during review)

Formatted: Highlight

Deleted: De novo identification of ostracod TEs

Formatted: Font: Italic

Deleted: 45

Deleted: 46

Deleted: 47

Deleted: 48

Deleted: y

Formatted: Highlight

Commented [MOU1]: Fernando, please confirm that we only did this for the fosmid data.

Deleted: 3

Deleted: 49

Commented [MOU2]: Fernando, if you could please add the software here?

Formatted: Highlight

Deleted: 50

each fosmid with partial and complete TE locations as identified by Censor at the amino-acid level.

We calculated the frequency of introns and exons, TEs and overlap with exons and introns, respectively, per fosmid and visualized these as boxplots in ggplot2 [52] in R [53]. For selected fosmids, we used the output files of gene predictions with Augustus and TE identification by Censor to draw the positions of transcripts, exons, introns and TEs with Circos [53].

## 2.5. Estimating single copy gene content in fosmid sequence data

To assess the representativity of selected fosmids with regard to coding sequences, we conducted Benchmarking set of Universal Single-Copy Orthologs (BUSCO) v3.0.2 analyses [55] of all fosmid sequence data using Arthropoda\_odb9 as reference database for single copy ortholog genes [56].

## 2.6. Search for remote homologies

To investigate the N-terminal domain in *R4/Dong* elements, we assembled a dataset of 5'-complete ORFs which included phylogenetically diverse additional sequences from GenBank identified by BLAST (accession numbers shown in Fig. 6), aligned with MUSCLE [57], extracted the N-terminal part upstream of the reverse transcriptase domain, and used the multiple sequence alignment as a query on the HHpred server [58] with default settings. The C-terminal extension of *DsGypsy1* had no detectable homologs and was used as a standalone query. The seed alignment for PF00249 (*Myb\_DNA-binding*) was downloaded from PFAM (<http://pfam.xfam.org/>). Structure-based alignments obtained with HHpred were visualized with Jalview v.2.11.1.3 [59] using the Clustal color scheme.

## 3. Results

### 3.1. TE diversity, substitution levels and abundance

The longest 341 contigs from 95 fosmids (Figure S1), providing a total of 2,39 Mbp-2,55 Mbp with an average length of 7,657bp-7,472 bp and a median of 4,242-4390bp (Table S3A & S3B) were further analyzed for TE and gene content (Figure 2). Details on potentially overlapping contigs are provided in Table S4.

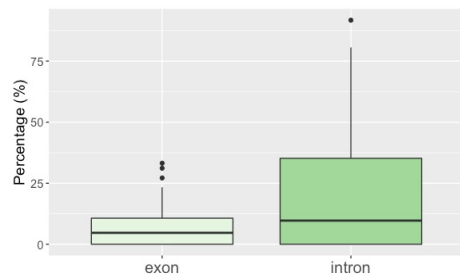

Deleted: 51

Deleted: 52

Deleted: 4

Deleted: 54

Deleted: 55

Deleted: 5

Deleted: 56

Deleted: 57

Deleted: 58

Deleted: &lt;object&gt;

Deleted: 2



**Figure 2: Box plots of intron and exon abundance.** The frequency of introns and exons were calculated as % of total fosmid lengths. Boxes contain the interquartile range from the 25<sup>th</sup> to the 75<sup>th</sup> percentile, the horizontal line indicates the median, and vertical lines minimum and maximum distributions of the data. Outliers are shown by dots.

Our analyses revealed a high diversity of TEs in the selected clones from the fosmid library of *D. stenosoma* and the Illumina draft genome [45], including LINE-like retrotransposons, LTR retrotransposons, various cut-and-paste DNA transposons and Helitrons (Figure 3). DNA transposons were best represented at 8.9% in the fosmids and 11.8% in the Illumina data, and belonged to Tc/mariner (most abundant at 8% in both datasets), hAT, Ginger, Merlin, Harbinger, and CMC-like DNA transposons, plus some uncharacterized DNA transposons. Similarly, for retrotransposons we found five major superfamilies of LINE-like elements (Jockey/I, CR1, L2, R4, RTE) with a total abundance of 4.2% and 2.8% in the fosmid and Illumina data, respectively, as well as gypsy-like (1%), Penelope-like elements (0.3%) and other unassigned retrotransposons (<0.1%) in the fosmids. Additionally, 4.2% of the sequence data were classified as non-LTR by Censor (Table S5), while Helitrons constituted 0.3% of the fosmid and 1.5% of the genomic sequence data. The high diversity of TEs in the fosmid data is also illustrated in 38 selected contigs containing mariner-1 (Figure 5a) and mariner-2 DNA TEs (Figure 5c, d), a mixture of DNA, LINE-like and LTR TEs (Figure 5b), and LINE-like RTE (Figure 5e) and CR1 (Figure 5f) TEs.

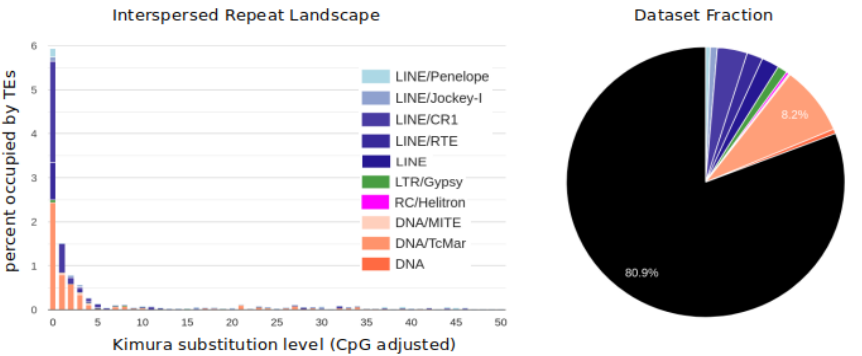

Deleted: of fosmid size (a) and

Deleted: of introns and exons

Deleted: (b). The size range of fosmids is provided in basepairs (bp). ...

Deleted: ,

Deleted:

Deleted: .2

Deleted: , even though only the mariner probe was used for selection (Table S1 and S2)

Formatted: Highlight

Commented [MOU3]: Irina, could you please advise if we should also report these numbers from the genome data as they are not visible in new Figure 3b or leave them out?

Deleted: DNA

Formatted: Highlight



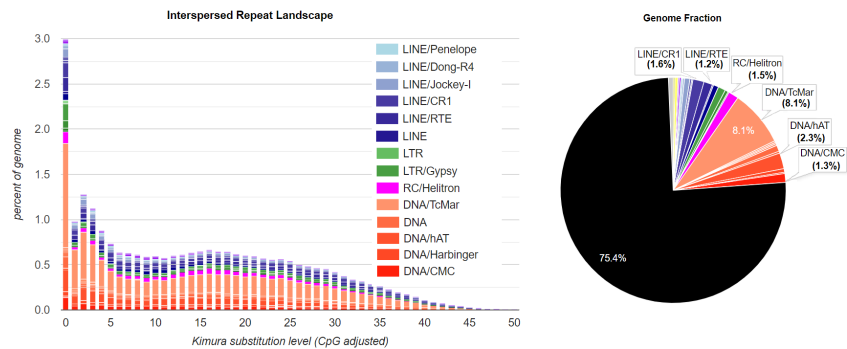

**Figure 3: Landscape divergence plots (left hand side) and genome occupancy by known TEs (right hand side) in *D. stevensoni*.** Divergences were calculated as Kimura substitution levels with adjusted CpG. Genome fraction of TEs was calculated after merging Repeat Masker and Censor outputs. (a, top) TEs in fosmid DNA sequence data. Genome fraction of TEs was calculated after merging Repeat Masker and Censor outputs. (b, bottom) TEs in the preliminary draft genome assembly [45]. The plot was constructed using the REPET library obtained with the Illumina assembly. The pie chart shows genome occupancy for TE categories occupying more than 1% of the genome.

The distribution of Kimura substitution levels on the TE divergence plot was negatively logarithmic in both data sets (Figure 3a & 3b), with most TEs having low substitution levels and only a few TEs showing high levels of substitution, indicating that most copies originated from relatively recent transposition events. In total, 19.1% of all fosmid DNA sequence data (Figure 3a) and 25.6% of the draft genome (Figure 3b) comprised (known) TE sequences. Repeat Masker and Censor estimated the median frequencies of TEs per fosmid as 8.6%-9.4% and 11.7%-12.8%, respectively, and average frequencies of 16.6%-17.5% and 16.0%-16.7%, respectively (Figure 4 and Table S3B). Average TE abundance estimated at the contig level was similar, with 13.7%-14.7% (Repeat Masker) and 16.5%-16.9% (Censor; Table S3A).

Deleted: fosmid DNA sequence data of

Deleted:

Formatted: Font: Bold

Formatted: Indent: First line: 0 cm

Deleted: (Figure 3)

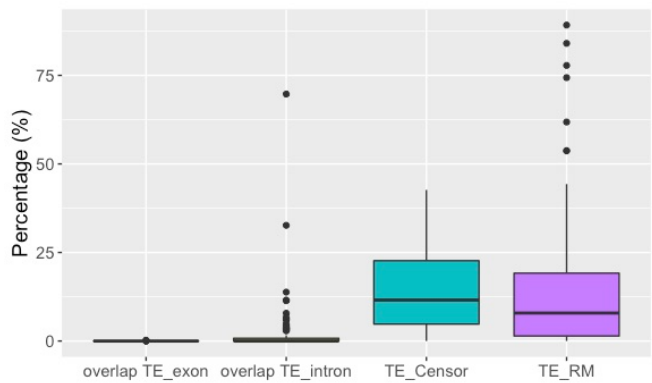

**Figure 4: Box plots of TE abundance and overlap of TEs with exons and introns in fosmid data.** TEs were identified with Censor from translated fosmid DNA sequences. All frequencies were calculated as % of total fosmid lengths. Boxes contain the interquartile range from the 25<sup>th</sup> to the 75<sup>th</sup> percentile, the horizontal line indicates the median, and vertical lines minimum and maximum distributions of the data. Outliers are shown by dots.

3.2. TE insertion sites in fosmids and their relationship to telomeres and coding regions

When comparing hybridization signals, there was no overlap between fosmids with a signal for telomeres and fosmids that contained TEs. With regard to coding regions, fosmids contained on average 6.4%-6.7% exons and 20.1% introns, with a maximum of 91.2% introns (Figure 2).

The second set of 11 fosmids that had been selected with probes for nuclear genes contained more exons and introns than the other fosmids (Figure S2). Most TEs were not located in exons or introns, as is obvious from Figure 4 and shown in detail in Tables S3A & B. While on average only 0.01% of TEs overlapped with exons, there was limited overlap between TEs and introns (Figure 4) with an average of 2.0%-2.1% for all fosmids and 9.8% for the second set of 11 fosmids (Figure S2). The medians for both features were 0 and 0-0.5%, respectively (Figure 4). The minimal overlap between TEs and coding regions is also visible in the sequence features of fosmids, of which 38 examples are visualized in Figure 5. The BUSCO analyses retrieved 23 complete BUSCO genes, of which 19 were single-copy and four duplicated, and an additional nine fragmented genes; 98.8% of the searched 2675 arthropod BUSCO genes were missing. Thus, in terms of core arthropod genes, the analyzed set of sequences does not comprise particularly gene-poor regions, representing about 1% of core genes, while it constitutes only ~0.35% of total genomic DNA as measured by flow cytometry/DAPI staining.

3.3. Additional domains in R4/Dong and Gypsy retrotransposons

While the majority of complete or nearly complete DNA and RNA TEs revealed the expected domain architectures, two retrotransposon families, R4/Dong and

Deleted: 1  
Deleted: seen  
Deleted: in  
Deleted: 1  
Deleted: six

*Gypsy* (Figures 5b and 6), deserve special mention. Members of the R4/Dong clade of non-LTR retrotransposons contain the reverse transcriptase and REL-endonuclease domains and insert into rDNA or into microsatellite targets. However, no recognizable motifs could be previously distinguished at their N-terminus, in contrast to rDNA-specific R2 retrotransposons with a similar REL-endonuclease which harbor an N-terminal Myb DNA-binding domain [60–64]. We aligned two *Dong* representatives with a full-length ORF from contigs 45 and 333 (Figure 5b) and a set of diverse R4/Dong-like elements from cnidarians, mollusks, insects, fish and nematodes, and used HHpred [62] to uncover a highly diverged SANT/Myb-like domain close to the N-terminus (Figure 6a), with the best scores obtained from rDNA-specific R4 elements of nematodes (94.9% probability hit to PF16282.6 for *Ancylostoma caninum*). In the well-studied rDNA-specific R2 clade, this domain reportedly directs site-specific insertion into rDNA, along with accompanying Zn-finger motifs [63]. Thus, it may be argued that the divergent Myb version found in *Dong*-like elements is similarly responsible for site-specific integration, albeit in the absence of Zn-finger motifs at the N-termini. In *D. stevensoni*, the *Dong* insertion target is represented by (TAA)<sub>n</sub> repeats, as is the case in most insects, mollusks and cnidarians, and is therefore located outside coding sequences.

The structure of *Gypsy*-like LTR-retrotransposons is similar to that of retroviruses, with the *gag* gene encoding a nucleocapsid and the *pol* gene encoding protease, reverse transcriptase and integrase enzymatic domains [28]. Inspection of the nearly complete *Gypsy\_Ds1* on contig 89 (Figure 5b) reveals an atypical 250-aa extension beyond the integrase domain, which typically ends with a GPY/F motif, but may contain an additional chromodomain at the extreme C-terminus. However, in the C-terminal extension of *Gypsy\_Ds1 pol*, HHpred identified remote similarity to the trimeric coiled-coil domains of spike proteins from enveloped +ssRNA viruses (coronaviruses) and dsRNA viruses (reoviruses) (Figure 6b) [65–67]. Although it also carries a potential furin-like protease cleavage site (RxxR), this extension domain is too short to represent a fully functional *env* (~600 aa), which is responsible for interaction with host membranes during viral entry and egress and is often found in LTR-retrotransposons as the third ORF [67]. Rather, it may be a remnant of an original *env* which was captured from an RNA virus and used for initial horizontal entry into the *D. stevensoni* host. Possible *env*-like ORF3 remnants were found in *Vesta* LTR-retrotransposons in the bdelloid rotifer *Adineta vaga* [69]. However, it is also possible that the C-terminal extension is unrelated to *env*, and the coiled-coil domain could instead be used for interaction of integrase with other proteins.

Deleted: 59

Deleted: 63

Deleted: 61

Deleted: knuckle

Deleted: 62

Deleted: knuckle

Deleted: 64

Deleted: 66

Deleted: 68

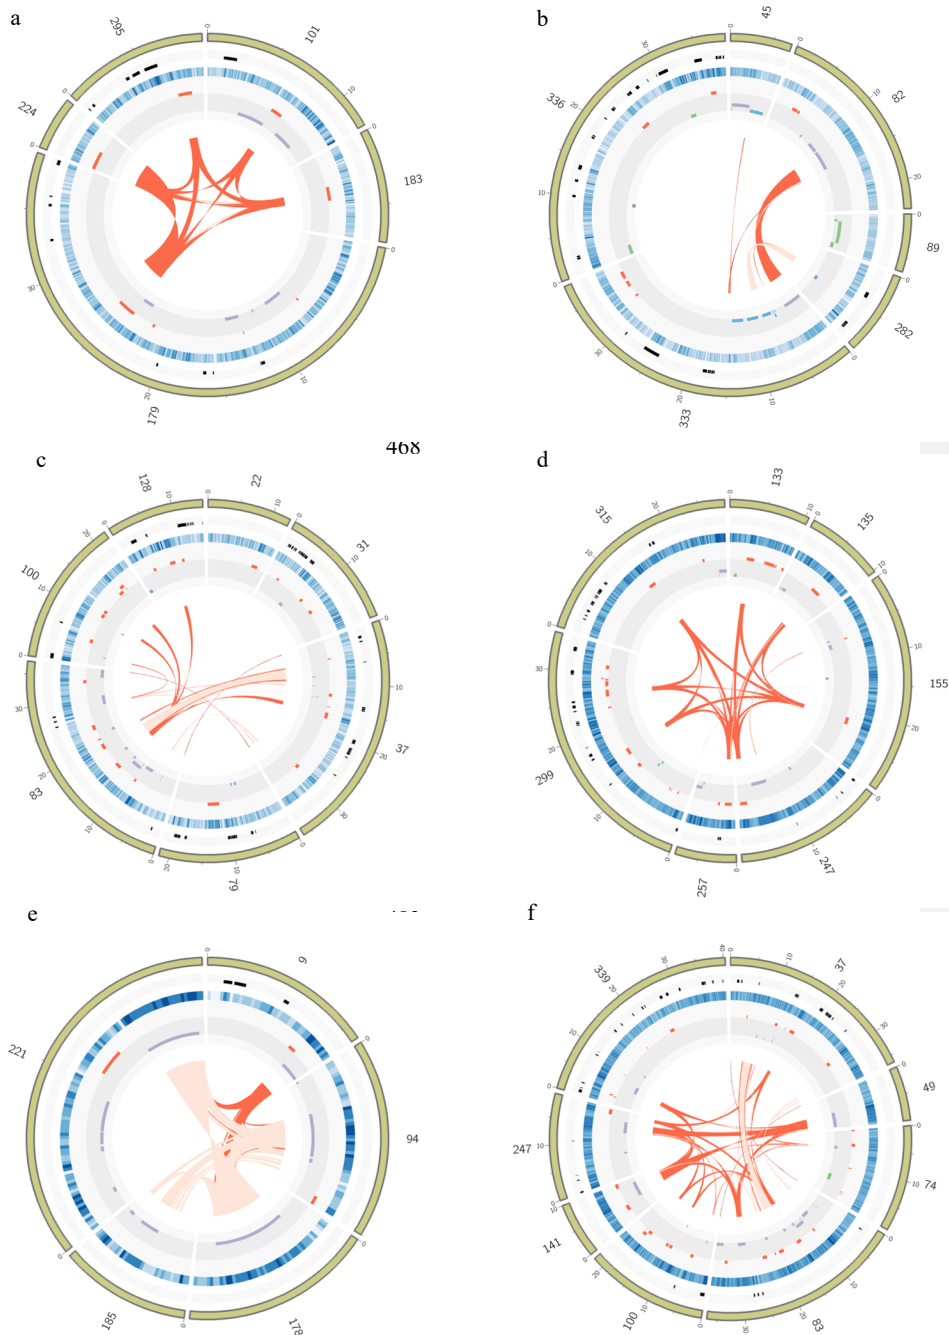

**Formatted:** Highlight

**Formatted:** Highlight

**Deleted:** showing, in the inward direction, the positions of exons (in black), GC content (in %, light blue), DNA TEs (in red), LINE TEs (in purple), Penelope-like TEs (in blue), LTR TEs (in green) and other TEs (in grey).

**Deleted:** hown in s

**Deleted:** is

**Deleted:** the

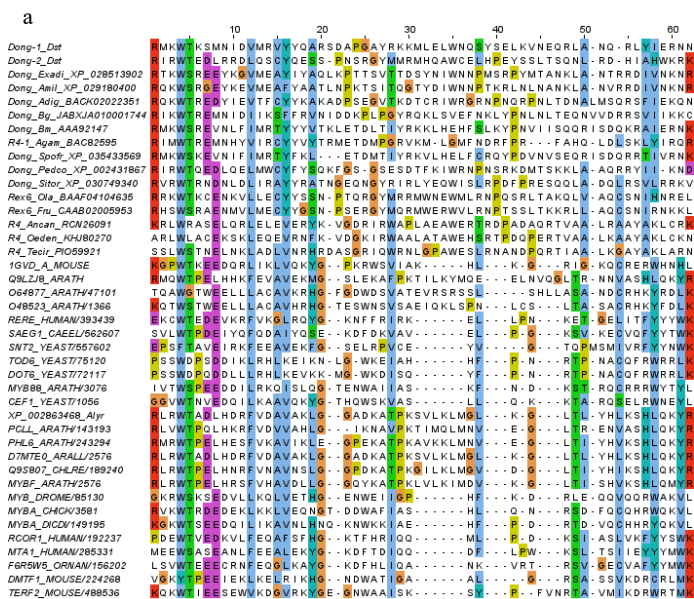

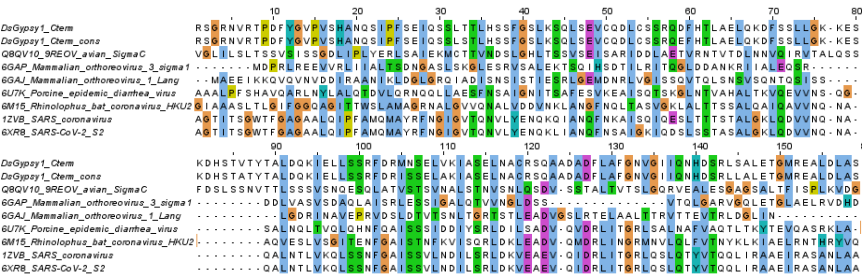

**Figure 6:** Regions of homology in *R4/Dong* (6a) and *Gypsy* (6b) retrotransposons of *D. stenosoni*. Multiple sequence alignments were visualized with Jalview [59]. 6a: Alignment includes *Dong1* and *Dong2* (*D. stenosoni*) and related elements from cnidarians (*Exaiptasia diaphana*, *Acropora millepora*, *Acropora digitata*), mollusks (*Biomphalaria glabrata*), insects (*Bombyx mori*, *Anopheles gambiae*, *Spodoptera frugiperda*, *Pediculus humanus corporis*, *Sitophilus oryzae*), fish (*Oryzias latipes*, *Takifugu rubripes*) and nematodes (*Ancylostoma caninum*, *Oesophagostomum dentatum*, *Teladorsagia circumcincta*) with the corresponding accession numbers, followed by a representative selection of Myb-like domains from the PF00249 seed alignment (25 out of 147). 6b: Structure-based alignment of *D. stenosoni Gypsy1* C-terminus (amino acids 1322–1479 out of 1486) and the central helix domain of the spike (sigma) proteins from reoviruses and coronaviruses identified by HHpred, with the corresponding PDB accession numbers.

#### 4. Discussion

##### 4.1. TE diversity and substitution levels

Our results show a high diversity of transposons in the genome of the putative ancient asexual ostracod *D. stenosoni* from both, fosmid library and draft genome data (Figure 3a,b and Figure 5). Compared to studies in another presumed anciently asexual taxon, bdelloid rotifers, the genome of the ostracod *D. stenosoni* seems to have a higher TE proportion for all major transposon groups. Given the exceptionally low transposable element load in bdelloids, especially for LINE-like elements [10,13,14], this result could be expected. Two species of putative ancient asexual oribatid mites, for which TE data are also available [18], contained similar levels of diversity as observed in the current study. In all three groups of putative ancient asexuals, the majority of TEs were DNA transposons (Figure 3a,b and 5; [10,13,14,18]), however this was not the case for the (younger) asexual *Daphnia* [17,70,71] and *Meloidogyne* nematodes [72]. The higher abundances of DNA transposons in putative ancient asexuals can probably best be explained by their prevailing transmission mode, which is often horizontal [31,73–75], and thus potentially less influenced by long-term loss of meiosis and sex. In aquatic habitats where the ostracod *D. stenosoni* occurs, horizontal transmission of TEs seems to be more common than in terrestrial habitats, because DNA is not exposed to UV or dry air [76].

Deleted: 58

Deleted: Its actual TE diversity is expected to be even higher, given that REPET, which is designed for analyses of whole-genome data, takes into account only transposons with at least three copies, while TEs occurring in the dataset once or twice could be detected only at the protein level by Censor.

Deleted: 69

Deleted: 70

Deleted: 71

Deleted: 72

Deleted: 74

Deleted: 75

The low number of nucleotide substitutions in TEs that was observed in the current study from both fosmid and genome data (Figure 3a,b) indicates that the majority of TEs in the genome of *D. stevensoni* have been recently active; similar patterns were described for the putative ancient asexual bdelloid rotifer *A. vaga* [76]. The study of Bast *et al.* [18] revealed higher levels of nucleotide substitutions in TEs of oribatid mites, inconsistent with recent activity. Since it is unclear if the methodologies of [18] were fully equivalent to the analyses conducted here and to [77], these differences will not be further discussed. Active transposition seems generally to be widespread in both animal and plant genomes [78], but uncontrolled copy number increase can be counteracted by genome defense systems, DNA decay and loss, and negative selection.

#### 4.2. TE abundance

Eukaryotic genomes can differ drastically in their genomic TE content, ranging from a few per cent to over 80% [79]. With an estimate of 19.1% (Figure 3) for all fosmid data, the transposable load in our fosmid DNA sequence data is slightly lower than the estimated TE abundance of *D. stevensoni* at the whole genome level (Figure 3b). This discrepancy can be explained by the fact that the Illumina repeat library showed about 5% higher TE content due to the addition of more divergent TE regions, which were only partially covered by Censor. While final conclusions on the transposon abundance in *D. stevensoni* should be deferred until high quality, genome-wide data from long read technologies become available, a transposable load of up to 26% (of known TEs) would be in the range of TE loads in other arthropods. In insects, TE abundances range from 6 up to 58% [80]. In aquatic crustaceans other than ostracods, such as crabs and shrimps, repeats and TEs can make up between 50.4% and 57% [81–83] of the genome, although TE content from 7.4% to 12.9% was reported for different assemblies of *Daphnia pulex* [17,70,71]. In other, probably younger, asexuals, TE content at the genome-wide scale can exceed 50%, as for example in *Meloidogyne* root-knot nematodes [72].

#### 4.3. TE insertion sites

One of the possible explanations for the relatively high TE content of *D. stevensoni* in our sequence data could be their genomic locations. Through partial selection of fosmids containing transposons, we might have sequenced some TE islands in the genome of *D. stevensoni* outside of coding regions. Our results detecting up to 19.4% exons in individual fosmids but only an average overlap of up to 0.01% between exons and TE and up to 2.1% between introns and TEs in the boxplot (Figure 4) support this point of view; and are illustrated for 38 selected fosmids in Figure 5a–f. These observed patterns would largely be consistent with predictions [79] on the predominantly neutral character for the bulk of TE insertions, but will require genome-wide data for confirmation. The available Illumina draft genome of *D. stevensoni* is too fragmented [45] to test these assumptions further.

Deleted: 76

Deleted: 77

Deleted: 78

Deleted: data

Deleted: probably

Deleted: comparable to the

Deleted: , given that only 13 out of 104 fosmids were selected with TE-specific probes (Table S2).

Deleted: 19.1

Deleted: %

Deleted: 79

Deleted: 80

Deleted: 82

Deleted: 69

Deleted: 70

Deleted: 71

Deleted: (biased)

Deleted:

Deleted: also

Deleted: (Figure 4 and

Deleted: )

Deleted: 78

Deleted: ,

Deleted: .

Formatted: Font: Italic

Formatted: Font:



Both, the draft genome of *D. stvensoni* as well as sequenced fosmids seem to harbor recently active transposons, as supported by the estimated low substitution levels indicating recent activity (Figure 3) and from overlapping TE-rich regions of fosmid contigs (see examples in Figure 5a-f). These indications for relatively recent transposition, together with the low number of insertions within exons (Figure 4), at least partly fit the dichotomous pattern that Muszewska *et al.* described from fungal transposons [84], where young TEs were not located inside genes, while older TEs were found both inside and outside of coding regions. It is also possible that the sequenced TE islands of *D. stvensoni* in the fosmid dataset could come from pericentromeric regions, given that we did not sequence any fosmids containing telomeres. Other studies on humans [85] and rice [86], for example, found a higher abundance of TEs near centromeres. The lack of LINE-like TEs being associated with telomeres in *D. stvensoni* in fosmid sequence data also indicates that there has been no co-option of the investigated TEs for telomeric functions, as in *Drosophila* [87] or bdelloid rotifers [88].

Deleted: The genomic regions of

Deleted: here

Deleted: 83

Deleted: our

Deleted: 84

Deleted: 85

Formatted: Font: Not Italic

Deleted: 86

Deleted: 87

#### 4.4. Assessing the impact of putatively ancient asexual reproduction on TE landscapes in non-marine ostracods

Following one of the predictions outlined in the introduction, long-term asexuality is expected to increase the transposable element load because of reduced efficiency of selection for the removal of deleterious mutations and transposons in finite populations [4,5,6]. Our results are consistent with this hypothesis. It is possible that asexual darwinulid ostracods inherited relatively high transposable loads from their sexual ancestors when abandoning sexual reproduction, which could go back as far as 200 myr ago [37] and to 25 Mya in *D. stvensoni* [38]. Glémin *et al.* implied that it might take a long time for asexuals to purge TEs from their genomes [25]. Our results indicate that even millions of years have not been sufficient for some Darwinulidae to efficiently purge their TE.

Unrestrained TE proliferation should eventually drive asexual lineages to extinction, unless asexual hosts can tightly control TE copy numbers [10-12], with putative ancient asexual bdelloids as the most striking example [10,13,14]. Eukaryotic hosts have developed a wide arsenal of molecular defense mechanisms against TEs [29,89], including for example siRNAs and piRNAs [90,91], and chromatin-based pathways [92]. The relatively high TE content and diversity in *D. stvensoni* could imply that some of these defense mechanisms are lacking or are less efficient, leading to the accumulation of transposons when these are not removed [25]. This explanation seems more likely than the lack of time for purging TEs from sexual ancestors. Alternatively, the insertion pattern of TEs in *D. stvensoni*, as suggested by our preliminary observations, may be biased towards non-coding regions, and could therefore have less deleterious effects on the host. The observed lack of insertions into exons as observed in the fosmid data is most likely explained by selection against genic insertions. Finally, certain TEs, such as *Dong*, display insertion specificity that directs them away from coding regions.

Deleted: 88

Deleted: 89

Deleted: 90

Deleted: 91

Another factor that can potentially influence transposon abundance is the presence of bacterial endosymbionts. Kraaijeveld et al. suggested that the higher copy numbers of *gypsy* transposons in asexual wasps as compared to sexual relatives [23] could partly be due to the feminizing endosymbiont *Wolbachia*, which is only present in asexuals. The *Cardinium* endosymbionts, which could have similar effects on their hosts as *Wolbachia*, have recently been described in non-marine ostracods including *D. stvensoni* [93], but their potential effect on transposable element loads in asexual ostracods remains to be investigated.

Our results based on an Illumina draft genome [45] and parts of a fosmid library indicate that asexual reproduction in the ostracod *D. stvensoni* did not substantially reduce its transposable load, as may have been the case in other asexual taxa [3,10,11,13,15,16,73]. On the contrary, it rather seems that this ostracod species is another example of an asexual being less efficient in removing TEs. Whether this is owing to the loss or dysfunction of molecular defense mechanisms controlling TE abundance, the absence of methylation, preferred insertion outside of coding regions, or other factors, remains to be investigated in future studies when comparative genomic and transcriptomic data of high quality for this and other ostracod species become available. The absence of sex in darwinulid ostracods has been estimated from fossil data to be as old as 25 myr (*D. stvensoni* [38]) up to 200 myr (the entire post-Palaeozoic family Darwinulidae, using *Alicenula* as proxy [37]), and many asexual darwinulids became extinct after the Permian-Triassic [94]. The fact that about 30 putative ancient asexual darwinulid species are still present today suggests that TE proliferation has not driven all of these species to extinction, as might be expected [11,12]. Comparisons with TE abundance in sexual ostracods and younger asexual species are required to test whether the observed patterns of TE abundance and diversity are general features related to the old age of Ostracoda of more than 400 myr [95] or to ancient asexuality of the Darwinulidae.

**Supplementary Materials:** The following are available online at [www.mdpi.com/xxx/s1](http://www.mdpi.com/xxx/s1), Figure S1: Box plot of size distribution of analysed contigs from the fosmid library. Size of sequenced contigs. Figure S2: Comparison of sequence features between three groups of fosmids. Table S1: Probes used for hybridization and detection of fosmids containing TE or telomeres. Table S2: Hybridization signal of selected fosmids for sequencing. Table S3A: Contig sequence features. Table S3B: Fosmid sequence features. Table S4: Overview of possible overlap between contig ends. Table S5: Results of TE identification with Censor.

**Author Contributions:** Conceptualization, I.S. and I.A.; methodology, F.R. and I.A.; software, F.R.; validation, I.S., F.R., M.D. and I.A.; formal analysis, I.S., F.R., M.D. and I.A.; investigation, I.S., K.M. and I.A.; resources, I.S. and K.M.; data curation, I.S., I.A. and F.R.; writing—original draft preparation, I.S.; writing—review and editing, I.S., F.R., K.M., M.S. and I.A.; visualization, I.S., F.R., M.S. and I.A.; supervision, F.R. and I.A.; project administration, I.S.; funding acquisition, I.S., K.M. All authors have read and agreed to the published version of the manuscript.

**Funding:** This research was funded by Belgian Federal Science Policy (Belspo), grant number WI/36/103. The stay of IS at Woods Hole was funded by the L. & A. Colwin Fund of the Marine Biology Laboratory, MA. MD was supported by the Blue Economy Internship Program (BEIP) of the Commonwealth of Massachusetts at the MBL.

**Acknowledgments:** Irina Yushenova (Woods Hole, USA) is acknowledged for helpful suggestions with the analyses, Andy Vierstraten (Gent, Belgium) and Arnaud Bellec (CNRGV, INRA, Toulouse, France) and his colleagues for technical support with fosmid sequencing, Marie Cours (Brussels, Belgium) for assistance in

Deleted: 92

Deleted: Although o

Deleted: data

Deleted: do not extend to a genome-wide scale,

Deleted: they

Deleted: 72

Deleted:

Deleted: 93

Deleted: 94

742 drawing the box plots, and Jeroen Venderickx (Brussels, Belgium) for providing the photograph of the *D.*  
743 *stevensoni* sample.

744 **Conflicts of Interest:** The authors declare no conflict of interest. The funders had no role in the design of the  
745 study; in the collection, analyses, or interpretation of data; in the writing of the manuscript, or in the decision to  
746 publish the results.

747

## References

- Hickey, D.A. Selfish DNA: a sexually-transmitted nuclear parasite. *Genetics*, **1982**, *101*, 519–531.
- Zeyl, C., Bell, G., Green, D.M. Sex and the spread of retrotransposon Ty3 in experimental populations of *Saccharomyces cerevisiae*. *Genetics*, **1996**, *143*, 1567–1577.
- Bast, J., Jaron, K.S., Schuseil, D., Roze, D., Schwander, T. Asexual reproduction reduces transposable element load in experimental yeast populations. *eLife*, **2019**, *8*, e48548. doi:10.7554/eLife.48548
- Kondrashov, A.S. Deleterious mutations and the evolution of sexual reproduction. *Nature*, **1988**, *336*, 435–440.
- Muller, H.J. The relation of recombination to mutational advance. *Mutat. Res.*, **1964**, *1*, 2–9.
- Dolgin, E.S., Charlesworth, B. The fate of transposable elements in asexual populations. *Genetics*, **2006**, *174*, 817–827. 10.1534/genetics.106.060434
- Bachtrog, D. Y-chromosome evolution: emerging insights into processes of Y-chromosome degeneration. *Nat. Rev. Genet.*, **2013**, *14*, 113–124. <https://doi.org/10.1038/nrg3366>
- Leung, W., Shaffer, C.D., Reed, L.K., Smith, S.T., Barshop, W., Dirkes, W., Dothager, M., Lee, P., Wong, J., Xiong, D., et al. *Drosophila* Muller F elements maintain a distinct set of genomic properties over 40 million years of evolution. *G3*, **2015**, *5*, 719–7440. 10.1534/g3.114.015966
- Lynch, M., Blanchard, J.L. Deleterious mutation accumulation in organelle genomes. *Genetica*, **1998**, *102–103*, 29–39. <https://doi.org/10.1023/A:1017022522486>
- Arkhipova, I., Meselson, M. Transposable elements in sexual and ancient asexual taxa. *Proc. Natl. Acad. Sci. U.S.A.*, **2000**, *97*, 14473–14477. <https://doi.org/10.1073/pnas.97.26.14473>
- Arkhipova, I., Meselson, M. Deleterious transposable elements and the extinction of asexuals. *Bioessays*, **2005**, *27*, 76–85. 10.1002/bies.20159
- Nuzhdin, S.V., Petrov, D.A. Transposable elements in clonal lineages: lethal hangover from sex. *Biol. J. Linn. Soc.*, **2003**, *79*, 33–41.
- Flot, J.F., Hespeels, B., Li, X., Noel, B., Arkhipova, I., Danchin, E.G., Hejnol, A., Henrissat, B., Koszul, R., Aury, J.M., et al. Genomic evidence for ameiotic evolution in the bdelloid rotifer *Adineta vaga*. *Nature*, **2013**, *500*, 453–457. <https://doi.org/10.1038/nature12326>
- Arkhipova, I.R., Meselson, M. Diverse DNA transposons in rotifers of the class Bdelloidea. *Proc. Natl. Acad. Sci. U.S.A.*, **2005**, *102*, 11781–11786. <https://doi.org/10.1073/pnas.0505333102>
- Schaack, S., Pritham, E.J., Wolf, A., Lynch, M. DNA transposon dynamics in populations of *Daphnia pulex* with and without sex. *Proc. R. Soc. B.*, **2010**, *277*, 2381–2387. <https://doi.org/10.1098/rspb.2009.2253>
- Rho, M., Schaack, S., Gao, X., Kim, S., Lynch, M., Tang, H. LTR retroelements in the genome of *Daphnia pulex*. *BMC Genomics*, **2010**, *11*, 425. 10.1186/1471-2164-11-425
- Jiang, X., Tang, H., Ye, Z., Lynch, M. Insertion polymorphisms of mobile genetic elements in sexual and asexual populations of *Daphnia pulex*. *Genome Biol. Evol.*, **2017**, *9*, 362–374. <https://doi.org/10.1093/gbe/evw302>
- Bast, J., Schaefer, I., Schwander, T., Maraun, M., Scheu, S., Kraaijeveld, K. No accumulation of transposable elements in asexual arthropods. *Mol. Biol. Evol.*, **2016**, *33*, 697–706. doi:10.1093/molbev/msv261
- Szitenberg, A., Cha, S., Opperman, C.H., Bird, D.M., Blaxter, M.L., Lunt, D.H. Genetic drift, not life history or RNAi, determine long-term evolution of transposable elements. *Genome Biol. Evol.*, **2016**, *8*, 2964–2978. 10.1093/gbe/evw208
- Agren, J.A., Greiner, S., Johnson, M.T., Wright, S.I. No evidence that sex and transposable elements drive genome size variation in evening primroses. *Evolution*, **2015**, *69*, 1053–1062. <https://doi.org/10.1111/evo.12627>
- Zeyl, C., Bell, G., Dasilva, J. Transposon abundance in sexual and asexual populations of *Chlamydomonas reinhardtii*. *Evolution*, **1994**, *48*, 1406–1409. 10.2307/2410398
- Abad, P., Gouzy, J., Aury, J.-M., Castagnone-Sereno, P., Danchin, E.G.J., Deleury, E., Perfus-Barbeoch, L., Anthouard, V., Artiguenave, F., Blok, V.C. et al. Genome sequence of the metazoan

- plant-parasitic nematode *Meloidogyne incognita*. *Nat. Biotechnol.*, **2008**, *26*, 909–915. <https://doi.org/10.1038/nbt.1482>
- Abad, P., Gouzy, J., Aury, J.-M., Castagnone-Sereno, P., Danchin, E.G.J., Deleury, E., Perfus-Barbeoch, L., Anthouard, V., Artiguenave, F., Blok, V.C. et al. Genome sequence of the metazoan plant-parasitic nematode *Meloidogyne incognita*. *Nat. Biotechnol.*, **2008**, *26*, 909–915. <https://doi.org/10.1038/nbt.1482>
23. Kraaijeveld, K., Zwanenburg, B., Hubert, B., Vieira, C., De Pater, S., Van Alphen, J.J.M., Den Dunnen, J.T., De Knijff, P. Transposon proliferation in an asexual parasitoid. *Mol. Ecol.*, **2012**, *21*, 3898–3906. [10.1111/j.1365-294X.2012.5582](https://doi.org/10.1111/j.1365-294X.2012.5582)
  24. Simonti, C.N., Pavlicev, M., Capra, J.A. Transposable element exaptation into regulatory regions is rare, influenced by evolutionary age, and subject to pleiotropic constraints. *Mol. Biol. Evol.*, **2017**, *34*, 2856–2869. doi:10.1093/molbev/msx219
  25. Glémin S, François CM, Galtier N. Genome Evolution in Outcrossing vs. Selfing vs. Asexual Species. *Methods Mol. Biol.*, **2019**, *1910*, 331–369. doi: 10.1007/978-1-4939-9074-0\_11
  26. Charlesworth, B., Langley, C. The evolution of self-regulated transposition of transposable elements. *Genetics*, **1986**, *112*, 359–383.
  27. Startek, M., Le Rouzic, A., Capy, P., Grzebelu, D., Gambin, A. Genomic parasites or symbionts? Modeling the effects of environmental pressure on transposition activity in asexual populations. *Theor. Popul. Biol.*, **2013**, *90*, 145–151. <https://doi.org/10.1016/j.tpb.2013.07.004>
  28. Arkhipova, I.R. Using bioinformatic and phylogenetic approaches to classify transposable elements and understand their complex evolutionary histories. *Mobile DNA*, **2017**, *8*, 19. doi:10.1186/s13100-017-0103-2
  29. Bourque, G., Burns, K.H., Gehring, M., Gorbunova, V., Seluanov, A., Hammell, M., Imbeault, M., Izsvák, Z., Levin, H.L., Macfarlan, T.S., Mager, D.L., Feschotte, C. Ten things you should know about transposable elements. *Genome Biol.*, **2018**, *19*, 199. doi: 10.1186/s13059-018-1577-z
  30. Huang, C.R., Burns, K.H., Boeke, J.D. Active transposition in genomes. *Ann. Rev. Gen.*, **2012**, *46*, 651–675. doi:10.1146/annurev-genet-110711-155616
  31. Peccoud, J., Loiseau, V., Cordaux, R., Gilbert, C. Horizontal transfer of transposons in insects. *Proc. Natl. Acad. Sci. U.S.A.*, **2017**, *114*, 4721–4726. [10.1073/pnas.1621178114](https://doi.org/10.1073/pnas.1621178114)
  32. Schön, I., Rossetti, G., Martens, K. Ancient asexual darwinulids : ancient scandals or scandalous gossip? In *Lost sex. The evolutionary biology of parthenogenesis*; Schön, I., Martens, K., Van Dijk, Eds.; Springer Academic Publishers, Dordrecht, The Netherlands, 2009, pp. 217–240.
  33. Heethoff, M., Norton, R.A., Scheu, S., Maraun, M. Parthenogenesis in oribatid mites (Acari, Oribatida): evolution without sex In *Lost sex. The evolutionary biology of parthenogenesis*; Schön, I., Martens, K., Van Dijk, Eds.; Springer Academic Publishers, Dordrecht, The Netherlands, 2009, pp. 241–258.
  34. Schwander, T. Evolution: The end of an ancient asexual scandal. *Curr. Biol.*, **2016**, *26*, R233–235. [10.1016/j.cub.2016.01.034](https://doi.org/10.1016/j.cub.2016.01.034)
  35. Schwander, T., Lee, H., Crespi, B.J. Molecular evidence for ancient asexuality in *Timema* stick insects. *Curr. Biol.*, **2011**, *21*, 1129–1134. [10.1016/j.cub.2011.05.026](https://doi.org/10.1016/j.cub.2011.05.026)
  36. Mark Welch, D., Ricci, C., Meselson, M. Bdelloid rotifers: progress in understanding the success of an evolutionary scandal. In *Lost sex. The evolutionary biology of parthenogenesis*; Schön, I., Martens, K., Van Dijk, Eds.; Springer Academic Publishers, Dordrecht, The Netherlands, 2009, pp. 259–280.
  37. Martens, K., Rossetti, G., Horne, D. How ancient are ancient asexuals? *Proc. R. Soc. B*, **2003**, *270*, 723–729. <https://doi.org/10.1098/rspb.2002.2270>
  38. Straub, E.B. Mikropaläontologische Untersuchungen im Tertiär zwischen Ehingen und Ulm a.d. Donau. *Geol. Jb.*, **1952**, *66*, 433–523.
  39. Schön, I., Arkhipova, I.R. Two families of non-LTR retrotransposons, *Syrinx* and *Daphne*, from the Darwinulid ostracod, *Darwinula stevensoni*. *Gene*, **2006**, *371*, 296–307.
  40. Shribak, M. Polychromatic polarization microscope: bringing colors to a colorless world. *Sci. Rep.*, **2015**, *5*, 17340. <https://doi.org/10.1038/srep17340>

41. Tétart, J. Les garnitures chromosomiques des Ostracodes d'eau douce. *Trav. Lab. Hydrobiol. Univ. Grenoble*, **1978**, 69-70, 113-140.
42. Frydrychová, R., Grossmann, P., Trubac, P., Vítková, M., & Marec, F.E. Phylogenetic distribution of TTAGG telomeric repeats in insects. *Genome* **2004**, *47*, 163-178. 10.1139/g03-100
43. Schön, I., Martens, K. No slave to sex. *Proc. R. Soc. Lond. B* **2003**, *270*, 827-833. <https://doi.org/10.1098/rspb.2002.2314>
44. Altschul, S.F., Gish, W., Miller, W., Myers, E.W. & Lipman, D.J. Basic local alignment search tool. *J. Mol. Biol.*, **1990**, *215*, 403-410. 10.1016/S0022-2836(05)80360-2
45. Tran Van, P., Anselmetti, Y., Bast, I., Dumas, Z., Galtier, N., Jaron, K., Martens, K., Parker, D., Robinson-Rechavi, M., Schwander, T., Simion, P. & Schön, I. First annotated genomes of draft genomes of three non-marine ostracods (Ostracoda, Crustacea) with different reproductive modes. *G3, accepted*. [bioRxiv 2020.12.02.409169](https://doi.org/10.1101/2020.12.02.409169); doi: <https://doi.org/10.1101/2020.12.02.409169>
46. Flutre, T., Duprat, E., Feuillet, C., Quesneville, H. Considering transposable element diversification in *de novo* annotation approaches. *PLoS One*, **2011**, *6*, e16526. doi: 10.1371/journal.pone.0016526
47. Quesneville, H., Bergman, C.M., Andrieu, O., Autard, D., Nouaud, D., Ashburner, M., Anxolabehere, D. Combined evidence annotation of transposable elements in genome sequences. *PLoS Computat. Biol.*, **2005**, *1*, 166-175. doi:10.1371/journal.pcbi.0010022
48. Wicker, T., Sabot, F., Hua-Van, A., Bennetzen, J.L., Capy, P., Chalhoub, B., Flavell, A., Leroy, P., Morgante, M., Panaud, O., et al. A unified classification system for eukaryotic transposable elements. *Nat. Rev. Genet.*, **2007**, *8*, 973-982. <https://doi.org/10.1038/nrg2165>
49. Smit, A.F.A., Hubley, R., Green, P. RepeatMasker Open-4.0. 2013-2015. Available online: <http://www.repeatmasker.org>.
50. Stanke, M., Schöffmann, O., Morgenstern, B., Waack, S. Gene prediction in eukaryotes with a generalized hidden Markov model that uses hints from external sources. *BMC Bioinform.*, **2006**, *7*, 62. <https://doi.org/10.1186/1471-2105-7-62>
51. Quinlan, A.R., Hall, I.M. BEDTools: a flexible suite of utilities for comparing genomic features. *Bioinformatics*, **2010**, *26*, 841-842. doi:10.1093/bioinformatics/btq033
52. Wickham, H. *ggplot2: Elegant Graphics for Data Analysis*. 2016. Springer-Verlag New York.
53. R Core Team. R: A language and environment for statistical computing. 2013. R Foundation for Statistical Computing, Vienna, Austria. <http://www.R-project.org/>. Author 1, A.B. (University, City, State, Country); Author 2, C. (Institute, City, State, Country). Personal communication, 2012.
54. Krzywinski, M., Schein, J., Birol, I., Connors, J., Gascoyne, R., Horsman, D., Jones, S.J., Marra, M.A. Circos: an information aesthetic for comparative genomics. *Genome Res.*, **2009**, *19*, 1639-1645. 10.1101/gr.092759.109
55. Waterhouse, R.M., Seppey, M., Simão, F.A., Manni, M., Ioannidis, P., Kliuchnikov, G., Kriventseva, E.V., Zdobnov, E.M. BUSCO Applications from Quality Assessments to Gene Prediction and Phylogenomics, *Mol. Biol. Evol.*, **2018**, *35*, 543-548. <https://doi.org/10.1093/molbev/msx319>
56. Simão, F.A., Waterhouse, R.M., Ioannidis, P., Kriventseva, E.V., Zdobnov, E.M. BUSCO: assessing genome assembly and annotation completeness with single-copy orthologs. *Bioinformatics*, **2015**, *31*, 3210-3212. <https://doi.org/10.1093/bioinformatics/btv351>
57. Edgar RC: MUSCLE: a multiple sequence alignment method with reduced time and space complexity. *BMC Bioinformatics* 2004, *5*:113.
58. Zimmermann, L., Stephens, A., Nam, S.Z., Rau, D., Kubler, J., Lozajic, M., Gabler, F., Soding, J., Lupas, A.N., Alva, V. A completely reimplemented MPI bioinformatics toolkit with a new HHpred server at its core. *J. Mol. Biol.*, **2018**, *430*, 2237-2243. 10.1016/j.jmb.2017.12.007
59. Waterhouse, A.M., Procter, J.B., Martin, D.M.A., Clamp, M., Barton, G.J. Jalview Version 2—a multiple sequence alignment editor and analysis workbench. *Bioinformatics*, **2009**, *25*, 1189-1191. 10.1093/bioinformatics/btp033

Deleted: ¶

Formatted: Font: 10 pt, English (US)

Formatted: Left, Indent: Left: 0 cm, Hanging: 0,75 cm

Formatted: Font: 10 pt, English (US)

Formatted: Font: 10 pt, Italic

Formatted: Font: 10 pt

Formatted: Font: 10 pt

60. Burke, W.D., Malik, H.S., Jones, J.P., Eickbush, T.H. The domain structure and retrotransposition mechanism of R2 elements are conserved throughout arthropods. *Mol. Biol. Evol.*, **1999**, *16*, 502-511. 10.1093/oxfordjournals.molbev.a026132
61. Volff, J.N., Körting, C., Froschauer, A., Sweeney, K., Scharf, M. Non-LTR retrotransposons encoding a restriction enzyme-like endonuclease in vertebrates. *J. Mol. Evol.*, **2001**, *52*, 351-360. 10.1007/s002390010165
62. Biedler, J.K., Chen, X., Tu, Z. Horizontal transmission of an R4 clade non-long terminal repeat retrotransposon between the divergent *Aedes* and *Anopheles* mosquito genera. *Insect Mol. Biol.*, **2015**, *24*, 331-337. 10.1111/imb.12160
63. Shivram, H., Cawley, D., Christensen, S.M. Targeting novel sites: The N-terminal DNA binding domain of non-LTR retrotransposons is an adaptable module that is implicated in changing site specificities. *Mob. Genet. Elements*, **2011**, *1*, 169-178. 10.4161/mge.1.3.18453
64. Kojima, K.K., Fujiwara, H. Cross-genome screening of novel sequence-specific non-LTR retrotransposons: various multicopy RNA genes and microsatellites are selected as targets. *Mol. Biol. Evol.*, **2004**, *21*, 207-217. 10.1093/molbev/msg235
65. Deng, Y., Liu, J., Zheng, Q., Yong, W., Lu, M. Structures and polymorphic interactions of two heptad-repeat regions of the SARS virus S2 protein. *Structure*, **2006**, *14*, 889-899. 10.1016/j.str.2006.03.007
66. Cai, Y., Zhang, J., Xiao, T., Peng, H., Sterling, S.M., Walsh, R.M., Jr., Rawson, S., Rits-Volloch, S., Chen, B. Distinct conformational states of SARS-CoV-2 spike protein. *Science*, **2020**, *369*, 1586-1592. 10.1126/science.abd4251
67. Dietrich, M.H., Ogden, K.M., Long, J.M., Ebenhoch, R., Thor, A., Dermody, T.S., Stehle, T. Structural and functional features of the reovirus  $\sigma 1$  tail. *J. Virol.*, **2018**, *92*, 14. 10.1128/JVI.00336-18
68. Malik, H.S., Henikoff, S., Eickbush, T.H. Poised for contagion: evolutionary origins of the infectious abilities of invertebrate retroviruses. *Genome Res.*, **2000**, *10*, 1307-1318. 10.1101/gr.145000
69. Rodriguez, F., Kenefick, A.W., Arkhipova, I.R. LTR-retrotransposons from bdelloid rotifers capture additional ORFs shared between highly diverse retroelement types. *Viruses*, **2017**, *9*, 78. 10.3390/v9040078
70. Colbourne, J.K., Pfrender, M.E., Gilbert, D., Thomas, W.K., Tucker, A., Oakley, T.H., Tokishita, S., Aerts, A., Arnold, G.J., Basu, M.K., et al. The ecoresponsive genome of *Daphnia pulex*. *Science*, **2011**, *331*, 555-561. 10.1126/science.1197761
71. Ye, Z., Xu, S., Spitze, K., Asselman, J., Jiang, X., Ackerman, M.S., Lopez, J., Harker, B., Raborn, R.T., Thomas, W.K., Ramsdell, J. A new reference genome assembly for the microcrustacean *Daphnia pulex*. G3: Genes, Genomes, Genetics, **2017**, *7*, 1405-1416. <https://doi.org/10.1534/g3.116.038638>
72. Blanc-Mathieu, R., Perfus-Barbeoch, L., Aury, J.M., Da Rocha, M., Gouzy, J., Sallet, E., Martin-Jimenez, C., Bailly-Bechet, M., Castagnone-Sereno, P., Flot, J.F. et al. Hybridization and polyploidy enable genomic plasticity without sex in the most devastating plant-parasitic nematodes. *PLoS Genet.*, **2017**, *13*, e1006777. <https://doi.org/10.1371/journal.pgen.1006777>
73. Schaack, S., Gilbert, C., Feschotte, C. Promiscuous DNA: horizontal transfer of transposable elements and why it matters for eukaryotic evolution. *Trends Ecol. Evol.*, **2010**, *25*, 537-546. doi:10.1016/j.tree.2010.06.001
74. Dupeyron, M., Leclercq, S., Cerveau, N., Bouchon, D., Gilbert, C. Horizontal transfer of transposons between and within crustaceans and insects. *Mobile DNA*, **2014**, *5*, 4. doi:10.1186/1759-8753-5-4
75. Wallau, G.L., Vieira, C., Loreto, É. Genetic exchange in eukaryotes through horizontal transfer: connected by the mobilome. *Mobile DNA*, **2018**, *9*, 6. doi:10.1186/s13100-018-0112-9
76. Metzger, M.J., Paynter, A.N., Siddall, M.E., Goff, S.P. Horizontal transfer of retrotransposons between bivalves and other aquatic species of multiple phyla. *Proc. Natl. Acad. Sci. U.S.A.*, **2018**, *115*, E4227-E4235. doi:10.1073/pnas.1717227115



- 956 77. Arkhipova, I.R., Rodriguez, F. Genetic and epigenetic changes involving (retro)transposons in  
 957 animal hybrids and polyploids. *Cytogenet. Genome Res.*, **2013**, *140*, 295–311.  
 958 <https://doi.org/10.1159/000352069>
- 959 78. Huang, C.R., Burns, K.H., Boeke, J.D. Active transposition in genomes. *Ann. Rev. Gen.*, **2012**, *46*,  
 960 651–675. doi:10.1146/annurev-genet-110711-155616
- 961 79. Arkhipova, I.R. Neutral theory, transposable elements, and eukaryotic genome evolution. *Mol.*  
 962 *Biol. Evol.*, **2018**, *35*, 332–1337. doi: 10.1093/molbev/msy083
- 963 80. Petersen, M., Armisen, D., Gibbs, R.A., Hering, L., Khila, A., Mayer, G., Richards, S., Niehuis, O.,  
 964 Misof, B. Diversity and evolution of the transposable element repertoire in arthropods with  
 965 particular reference to insects. *BMC Evol. Biol.*, **2019**, *19*, 11. doi: 10.1186/s12862-018-1324-9
- 966 81. Song, L., Bian, C., Luo, Y., Bian, C., Luo, Y., Wang, L., You, X., Li, J., *et al.* Draft genome of the  
 967 Chinese mitten crab, *Eriocheir sinensis*. *GigaSci*, **2016**, *5*, 5. doi:10.1186/s13742-016-0112-y
- 968 82. Yuan, J., Gao, Y., Zhang, X., Wei, J., Liu, C., Li, F., Xiang, J. Genome sequences of marine shrimp  
 969 *Exopalaemon carinicauda* Holthuis provide insights into genome size evolution of Caridea. *Marine*  
 970 *drugs*, **2017**, *15*, 213. doi:10.3390/md15070213
- 971 83. Kao, D., Lai, A.G., Stamatakis, E., Rosic, S., Konstantinides, N., Jarvis, E., Di Donfrancesco, A.,  
 972 Pouchkina-Stancheva, N., Semon, M., Grillo, M., Bruce, H. The genome of the crustacean  
 973 *Parhyale hawaiiensis*, a model for animal development, regeneration, immunity and lignocellulose  
 974 digestion. *Elife*, **2016**, *5*, e20062. 10.7554/eLife.20062
- 975 84. Muszewska, A., Steczkiewicz, K., Stepniewska-Dziubinska, M. *et al.* Transposable elements  
 976 contribute to fungal genes and impact fungal lifestyle. *Sci. Rep.*, **2019**, *9*, 4307. doi:10.1038/s41598-  
 977 019-40965-0
- 978 85. Hartley, G., O'Neill, R.J. Centromere repeats: hidden gems of the genome. *Genes*, **2019**, *10*, 223.  
 979 doi:10.3390/genes10030223
- 980 86. Gao, D., Jiang, N., Wing, R.A., Jiang, J., Jackson, S.A. Transposons play an important role in the  
 981 evolution and diversification of centromeres among closely related species. *Front. Plant*  
 982 *Sci.*, **2015**, *6*, 216. doi:10.3389/fpls.2015.00216
- 983 87. Pardue, M.-L., DeBaryshe, P.G. Retrotransposons that maintain chromosome ends. *Proc. Natl.*  
 984 *Acad. Sci. U.S.A.*, **2011**, *108*, 20317–20324. <https://doi.org/10.1073/pnas.1100278108>
- 985 88. Gladyshev, E.A., Arkhipova, I.R. Telomere-associated endonuclease-deficient Penelope-like  
 986 retroelements in diverse eukaryotes. *Proc. Natl. Acad. Sci. U.S.A.*, **2007**, *104*, 9352–9357.  
 987 <https://doi.org/10.1073/pnas.0702741104>
- 988 89. Goodier, J.L. Restricting retrotransposons: a review. *Mobile DNA*, **2016**, *7*, 16. doi:10.1186/s13100-  
 989 016-0070-z
- 990 90. Rodriguez, F., Arkhipova, I.R. Multitasking of the piRNA silencing machinery: targeting  
 991 transposable elements and foreign genes in the bdelloid rotifer *Adineta vaga*. *Genetics*, **2016**, *203*,  
 992 255–268. doi: 10.1534/genetics.116.186734
- 993 91. Rodriguez, F., Arkhipova, I.R. Multitasking of the piRNA silencing machinery: targeting  
 994 transposable elements and foreign genes in the bdelloid rotifer *Adineta vaga*. *Genetics*, **2016**, *203*,  
 995 255–268. doi: 10.1534/genetics.116.186734
- 996 92. Molaro, A., Malik, H.S. Hide and seek: how chromatin-based pathways silence retroelements in  
 997 the mammalian germline. *Curr. Opin. Genet. Dev.*, **2016**, *37*, 51–58.  
 998 doi:10.1016/j.gde.2015.12.001
- 999 93. Schön, I., Kamiya, T., Van den Berghe, T., Van den Broecke, L., Martens, K. The evolutionary  
 1000 history of novel *Cardinium* strains and their non-marine ostracod (Crustacea) hosts. *Mol. Phyl.*  
 1001 *Evol.*, **2019**, *130*, 406–415. 10.1016/j.ympev.2018.09.008
- 1002 94. Martens, K., Horne, D.J., Griffiths, H.I. Age and diversity of non-marine ostracods. In: *Sex and*  
 1003 *Parthenogenesis. Evolutionary Ecology of Reproductive Modes in Non-Marine Ostracods*; Martens, K.,  
 1004 Ed.; Backhuys Publishers, Leiden, 1998, pp. 37–55.
- 1005 95. Wolfe, J.M., Daley, A.C., Legg, D.A., Edgecombe, G.D. Fossil calibrations for the arthropod Tree  
 1006 of Life. *Earth-Sci. Rev.*, **2016**, *160*, 43–110. <https://doi.org/10.1016/j.earscirev.2016.06.008>

1007 **Publisher’s Note:** MDPI stays neutral with regard to jurisdictional claims in published maps and institutional  
1008 affiliations.

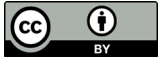

© 2020 by the authors. Submitted for possible open access publication under the terms and conditions of the Creative Commons Attribution (CC BY) license (<http://creativecommons.org/licenses/by/4.0/>).

1009
